# Supplementary material
Source: PubMed Central journal article supplement (PMC9307757)
Supplement: 41598_2022_16549_MOESM1_ESM.pdf [file 41598_2022_16549_MOESM1_ESM.pdf]

# A comparison of high-throughput SARS-CoV-2 sequencing methods from nasopharyngeal samples

Zuzana Gerber, Christian Daviaud, Damien Delafoy, Florian Sandron, Enagnon Kazali Alidjinou, Jonathan Mercier, Sylvain Gerber, Vincent Meyer, Anne Boland, Laurence Bocket, Robert Olaso, Jean-François Deleuze.

## Supplementary Figures

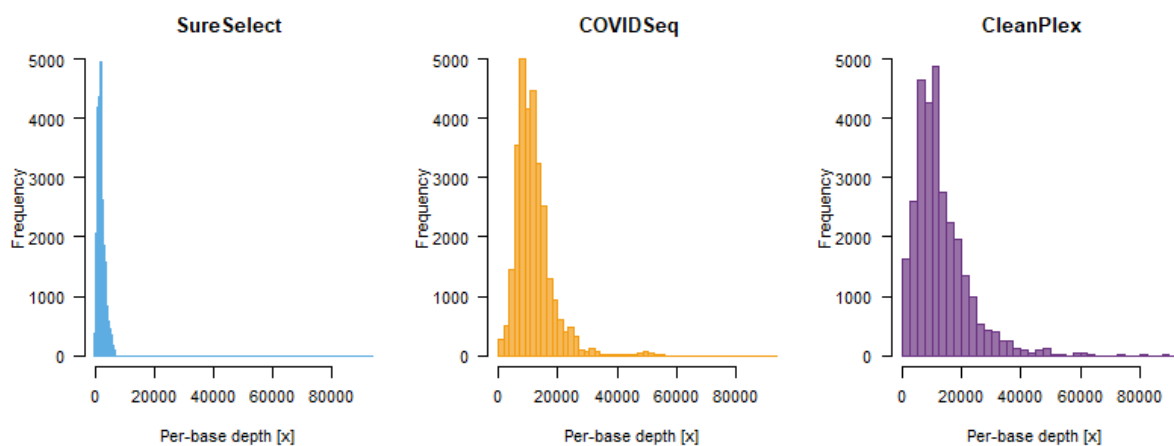

*Suppl. Figure 1. A histogram of per-base depth of a typical library. A wider distribution confirms heterogeneous coverage for CleanPlex. Furthermore, higher frequency in the leftmost bin indicates the presence of poorly covered regions in case of CleanPlex.*
